# Supplementary material
Source: MDPI journal article supplement (https://www.mdpi.com/1999-4907/13/1/127)
Supplement: s1 [file s1]

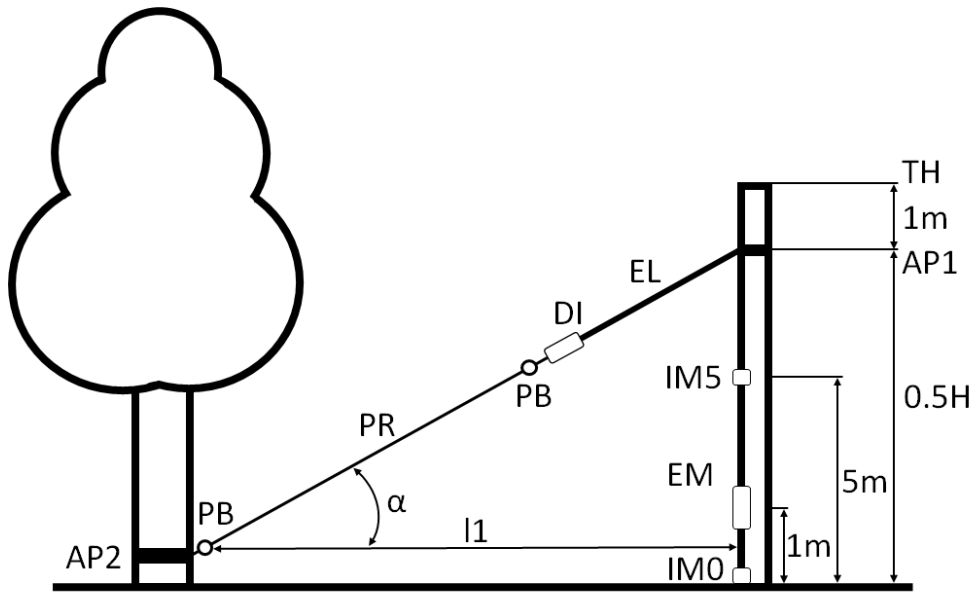

**Figure S1.** A scheme of the destructive static pulling test setup. AP1 and AP2—anchor points; PB—pulley block; PR—polyester rope; EL—extension line; DI— dynamometer;  $\alpha$ — the slope angle of the pulling line;  $l_1$ — the distance between the sample tree and the anchoring tree; IM0 and IM5—inclinometers at the height of 0 and 5 m, respectively; EM—elastometer; H—tree height; TH—topping height.

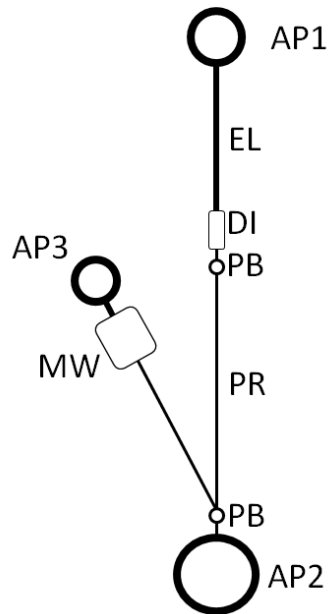

**Figure S2.** A scheme of the location of winch in the static pulling test setup. AP1, AP2 and AP3—anchor points; MW—motor winch; PB—pulley block; PR—polyester rope; EL—extension line; DI— dynamometer.
